# Supplementary material for: Ragweed Major Allergen Amb a 11 Recombinant Production and Clinical Implications
Source: MDPI journal article supplement (doi:10.3390/biom13010182), 2023-01-16
Supplement: s1 [file s1]

**Table nr. 3. Logistic regression analysis**

|                                           |                                   |
|-------------------------------------------|-----------------------------------|
| Dependent Y                               | Asthma symptoms score = 3 or more |
| Method                                    | Backward                          |
| Enter variable if P<                      | 0.05                              |
| Remove variable if P>                     | 0.25                              |
| Sample size                               | 150                               |
| Positive cases (symptoms score $\geq 3$ ) | 53 (35.33%)                       |
| Negative cases (symptoms score <3)        | 97 (64.67%)                       |

**Overall Model Fit**

|                               |            |
|-------------------------------|------------|
| Null model - 2 Log Likelihood | 194.846    |
| Full model -2 Log Likelihood  | 167.112    |
| Chi-squared                   | 27.733     |
| DF                            | 6          |
| Significance level            | P = 0.0001 |
| Cox & Snell R <sup>2</sup>    | 0.1688     |
| Nagelkerke R <sup>2</sup>     | 0.2321     |

**Coefficients and Standard Errors**

| Variable                      | Coefficient | Std. Error | Wald    | P       |
|-------------------------------|-------------|------------|---------|---------|
| IgE sensitization to Amb a 10 | 0.60315     | 0.50962    | 1.4007  | 0.2366  |
| IgE sensitization to Amb a 11 | 1.57292     | 0.49899    | 9.9363  | 0.0016  |
| IgE sensitization to Amb a 6  | -0.67496    | 0.43405    | 2.4181  | 0.1199  |
| Positive dog SPT              | 2.01305     | 0.60417    | 11.1016 | 0.0009  |
| Positive fungi SPT            | -1.03032    | 0.59917    | 2.9570  | 0.0855  |
| Domestic exposure to cat      | 1.20677     | 0.48511    | 6.1883  | 0.0129  |
| Constant                      | -2.06244    | 0.50600    | 16.6139 | <0.0001 |

|                                               |
|-----------------------------------------------|
| Variables not included in the model           |
| Age (>40 years)                               |
| Allergy history (>6 years)                    |
| Positive HDM SPT                              |
| Positive family allergic disease history      |
| Polysensitization status                      |
| IgE sensitization to Amb a 4                  |
| IgE sensitization to Amb a 5                  |
| IgE sensitization to Amb a 8                  |
| IgE sensitization to Amb a 9                  |
| IgE sensitization to Amb a 12                 |
| Patients sex                                  |
| Professional exposure (dust, smoke, solvents) |
| Current or passive smoker status              |
| Positive cat SPT                              |
| Positive gramineae SPT                        |

|                              |
|------------------------------|
| Domestic exposure to dog     |
| Domestic exposure to rodents |

#### Odds Ratios and 95% Confidence Intervals

| Variable                      | Odds ratio | 95% CI            |
|-------------------------------|------------|-------------------|
| IgE sensitization to Amb a 10 | 1.8279     | 0.6732 to 4.9630  |
| IgE sensitization to Amb a 11 | 4.8207     | 1.8128 to 12.8193 |
| IgE sensitization to Amb a 6  | 0.5092     | 0.2175 to 1.1922  |
| Positive dog SPT              | 7.4861     | 2.2907 to 24.4646 |
| Positive fungi SPT            | 0.3569     | 0.1103 to 1.1549  |
| Domestic exposure to cat      | 3.3427     | 1.2917 to 8.6502  |

#### Hosmer & Lemeshow test

|                    |            |
|--------------------|------------|
| Chi-squared        | 3.0063     |
| DF                 | 6          |
| Significance level | P = 0.8081 |

| Group | Y=0      |          | Y=1      |          | Total |
|-------|----------|----------|----------|----------|-------|
|       | Observed | Expected | Observed | Expected |       |
| 1     | 15       | 14.092   | 0        | 0.908    | 15    |
| 2     | 12       | 13.220   | 3        | 1.780    | 15    |
| 3     | 17       | 17.931   | 6        | 5.069    | 23    |
| 4     | 11       | 9.558    | 3        | 4.442    | 14    |
| 5     | 27       | 26.660   | 16       | 16.340   | 43    |
| 6     | 8        | 8.514    | 9        | 8.486    | 17    |
| 7     | 5        | 5.346    | 10       | 9.654    | 15    |
| 8     | 2        | 1.680    | 6        | 6.320    | 8     |

#### Classification table (cut-off value p=0.5)

| Actual group                          | Predicted group |    | Percent correct |
|---------------------------------------|-----------------|----|-----------------|
|                                       | 0               | 1  |                 |
| Y = 0                                 | 86              | 11 | 88.66%          |
| Y = 1                                 | 30              | 23 | 43.40%          |
| Percent of cases correctly classified |                 |    | 72.67%          |

#### ROC curve analysis

|                                |                |
|--------------------------------|----------------|
| Area under the ROC curve (AUC) | 0.743          |
| Standard Error                 | 0.0410         |
| 95% Confidence interval        | 0.665 to 0.810 |
